# Supplementary material for: Assessment of some biological properties of soils across selected farming communities of Southern and Northern Nigeria
Source: Research Square preprint supplement (doi:10.21203/rs.3.rs-6011360/v1), 2025-03-06
Supplement: Supplementary file 1 [file 7dae1b945f1fce49b5079753.docx]

Effect of locations on some microbial properties of soils in Southern and Northern Nigeria.

| Location Bact Fun Yea Bact/Fun Bact/Yea Fun/Yea  CFU/ml (x107) ........SFU/ml (x 106)..... (x101) (x 101) | | | | | | |
| --- | --- | --- | --- | --- | --- | --- |
| L1 | 12.31a | 1.55b | 5.08c | 9.39a | 3.26a | 0.48a |
| L2 | 10.38bc | 1.26c | 4.93d | 8.83a | 2.22b | 0.25b |
| L3 | 9.83c | 2.88a | 12.69a | 7.22b | 0.86d | 0.25bc |
| L4 | 10.63b | 1.56b | 6.99b | 3.58c | 1.64c | 0.23c |

Means sharing the same letter within a column for the same parameter is statistically indistinguishable from each other as determined by Tukey’s test at P ≤ 0.05 for soil (n = 6). Bact: Bacteria; Fun: Fungi; Yea: Yeast.

Effect of communities on some microbial properties of soils in Southern and Northern Nigeria.

| Community Bact Fun Yea Bact/Fun Bact/Yea Fun/Yea  CFU/ml (x107) ....SFU/ml (x 106)... (x101) (x 101) | | | | | | |
| --- | --- | --- | --- | --- | --- | --- |
| C1 | 12.78a | 1.98b | 9.01a | 7.68a | 1.80b | 0.23c |
| C2 | 9.76b | 2.08a | 7.43b | 5.65b | 2.15a | 0.43a |
| C3 | 9.82b | 1.37c | 5.84c | 8.45a | 2.03a | 0.25b |

Means sharing the same letter within a column for the same parameter is statistically indistinguishable from each other as determined by Tukey’s test at P ≤ 0.05 for soil (n = 6). Bact: Bacteria; Fun: Fungi; Yea: Yeast.

Effect of Farmer´s field on some microbial properties of soils in Southern and Northern Nigeria.

| Farmer´s field Bact Fun Yea Bact/Fun Bact/Yea Fun/Yea  CFU/ml (x107) ....SFU/ml (x 106).......... (x101) (x 101) | | | | | | |
| --- | --- | --- | --- | --- | --- | --- |
| F1 | 11.69a | 1.62c | 7.03c | 8.24a | 1.95b | 0.24c |
| F2 | 10.82b | 2.02a | 7.98a | 6.28c | 2.24a | 0.41a |
| F3 | 9.85c | 1.79b | 7.26b | 7.26b | 1.80b | 0.26b |

Means sharing the same letter within a column for the same parameter is statistically indistinguishable from each other as determined by Tukey’s test at P ≤ 0.05 for soil (n = 6). Bact: Bacteria; Fun: Fungi; Yea: Yeast.

Interaction effects of locations by communities by farmer´s field on some microbial properties of soils in Southern and Northern Nigeria.

| **Location Community Farmer´s field Bact Fun Yea Bact/Fun Bact/Yea Fun/Yea**  **CFU/ml (x107) .....SFU/ml (x 106)... (x101) (x 101)** | | | | | | | | |
| --- | --- | --- | --- | --- | --- | --- | --- | --- |
| **L1** | C1 | F1 | 16.33b | 1.70e | 7.37e | 9.64c-h | 2.22d-j | 0.23c |
|  |  | F2 | 16.40b | 2.10d | 8,27d | 7.82c-i | 1.98e-k | 0.25c |
|  |  | F3 | 20.33a | 1.10ijk | 4.30h | 18.57a | 4.74b | 0.26c |
|  | C2 | F1 | 12.33c-f | 1.50e-h | 6.27f | 8.18c-i | 1.95e-l | 0.24c |
|  |  | F2 | 12.43c-f | 3.04b | 1.30jc | 4.09ijk | 9.59a | 2.35a |
|  |  | F3 | 5.87jkl | 2.10d | 8.27d | 2.79jk | 0.71mn | 0.25c |
|  | C3 | F1 | 14.23bcd | 0.85jk | 3.50ic | 16.81ab | 4.07bc | 0.24c |
|  |  | F2 | 7.51h-l | 0.78k | 3.05i | 9.64c-h | 2.46d-h | 0.26c |
|  |  | F3 | 34.57l | 0.78k | 3.43i | 7.03e-k | 1.58g-n | 0.23c |
| **L2** | C1 | F1 | 14.30bcd | 1.70e | 6.76ef | 8.43c-i | 2.11d-k | 0.25c |
|  |  | F2 | 7.30h-l | 1.30f-i | 5.53g | 5.64g-k | 1.32h-n | 0.24c |
|  |  | F3 | 9.47e-i | 0.76k | 3.10i | 12.51bc | 3.05cde | 0.24c |
|  | C2 | F1 | 14.63bcd | 2.27cd | 8.37d | 6.48f-k | 1.75f-m | 0.27c |
|  |  | F2 | 6.53i-l | 1.49e-h | 5.53g | 4.41ijk | 1.18i-n | 0.27c |
|  |  | F3 | 12.27c-f | 1.06ijk | 4.30h | 11.57c-e | 2.85def | 0.25c |
|  | C3 | F1 | 9.07e-j | 0.76k | 3.03i | 11.98bcd | 3.00cde | 0.25c |
|  |  | F2 | 15.27bc | 1.22hi | 4.70h | 12.48bc | 3.25cd | 0.26c |
|  |  | F3 | 4.57l | 0.76k | 3.03i | 5.99f-k | 1.51g-n | 0.25c |
| **L3** | C1 | F1 | 11.33d-g | 2.44cd | 12.23b | 4.65ijk | 0.93k-n | 0.20c |
|  |  | F2 | 12.37c-f | 3.23b | 16.13a | 3.82ijk | 0.77lmn | 0.20c |
|  |  | F3 | 8.20g-k | 3.22b | 16.23a | 2.56k | 0.51n | 0.20c |
|  | C2 | F1 | 8.90f-k | 2.22cd | 8.33d | 4.02ijk | 1.07j-n | 0.27c |
|  |  | F2 | 7.33h-l | 3.30a | 16.04a | 2.23k | 0.46n | 0.21c |
|  |  | F3 | 9.40e-j | 4.27a | 16.02a | 2.21k | 0.59mn | 0.26c |
|  | C3 | F1 | 12.40c-f | 2.47c | 12.23b | 5.03g-k | 1.01j-n | 0.20c |
|  |  | F2 | 12.20c-f | 2.48c | 12.60b | 4.92h-k | 0.98k-n | 0.20c |
|  |  | F3 | 6.37i-l | 2.26cd | 4.40h | 2.81jk | 1.45h-n | 0.52b |
| **L4** | C1 | F1 | 12.37c-f | 1.64ef | 8.36d | 7.56d-j | 1.48h-n | 0.20c |
|  |  | F2 | 9.57e-i | 2.42cd | 9.60c | 3.95ijk | 1.00k-n | 0.25c |
|  |  | F3 | 15.40bc | 2.20cd | 10.20c | 7.04e-k | 1.51g-n | 0.22c |
|  | C2 | F1 | 6.40i-l | 0.77k | 4.53h | 5.49g-k | 1.42h-n | 0.26c |
|  |  | F2 | 12.57cde | 1.27ghi | 4.67h | 9.90c-g | 2.69d-g | 0.27c |
|  |  | F3 | 8.53g-k | 1.33f-i | 5.47g | 6.40f-k | 1.57g-n | 0.25c |
|  | C3 | F1 | 8.10g-l | 0.77k | 3.40i | 10.67c-f | 2.39d-i | 0.23c |
|  |  | F2 | 10.33e-h | 1.63efg | 8.35d | 6.41f-k | 1.24i-n | 0.20c |
|  |  | F3 | 12.40c-f | 1.64ef | 8.37d | 7.59d-j | 1.48h-n | 0.20c |

Means sharing the same letter within a column for the same parameter is statistically indistinguishable from each other as determined by Tukey’s test at P ≤ 0.05 for soil (n = 6). Bact: Bacteria; Fun: Fungi; Yea: Yeast.
